# Supplementary material
Source: publisher figshare collection journal article supplement (https://sage.figshare.com/ndownloader/files/16510565)
Supplement: Supplementary file 1 [file 16510565]

2    **Supplemental Figure Legend**

3    **Supplemental Figure 1:**     Annual number of injuries by level of play (Major League  
4    Baseball [MLB] vs. Minor League Baseball [MiLB]).

5    **Supplemental Figure 2:**     Annual number of injuries by body region (hand/fingers vs.  
6    wrist).
